# Supplementary material for: Arsenic and Heavy Metal Accumulation and Risk Assessment in Soils around Mining Areas: The Urad Houqi Area in Arid Northwest China as an Example
Source: MDPI journal article supplement (doi:10.3390/ijerph15112410), 2018-10-30
Supplement: s1 [file s1]

## Supplementary Materials

# Arsenic and heavy metal accumulation and risk assessment in soils around mining areas: Taking the Urad Houqi area in arid northwest China as an example

## Contents

### Table S1 Summary of the 14 key investigated sites in Urad Houqi

Table S1 Summary of the 14 key investigated sites in Urad Houqi

| Site ID | Enterprise Name                                    | Location (Town)    | Industry                       | Note               |
|---------|----------------------------------------------------|--------------------|--------------------------------|--------------------|
| 1       | Zhenyuan Mineral Concentration Factory             | Bayinbaolige Town  | Lead and zinc mining           | Production stopped |
| 2       | Urad Houqi Zijin Mining Co., Ltd                   | Bayinbaolige Town  | Common nonferrous metal mining |                    |
| 3       | Wancheng Business Dongshengmiao Co., Ltd           | Bayinbaolige Town  | Lead and zinc mining           | Production stopped |
| 4       | Inner Mongolia Dongshengmiao Mining Co., Ltd       | Bayinbaolige Town  | Lead and zinc mining           |                    |
| 5       | Bayan Nur Zijin Nonferrous Metal Co., Ltd          | Bayinbaolige Town  | Lead and zinc smelting         | Production stopped |
| 6       | Inner Mongolia Qihua Mineral Concentration Factory | Huhewenduer Town   | Lead and zinc mining           |                    |
| 7       | Inner Mongolia Qihua Sulfuric Acid Factory         | Huhewenduer Town   | Inorganic acid manufacturing   | Relocation         |
| 8       | Urad Houqi Qianzhen Mineral Concentration Co., Ltd | Huhewenduer Town   | Lead and zinc mining           |                    |
| 9       | Bayan Nur Feishang Copper Co., Ltd                 | Huhewenduer Town   | Copper smelting                | Production stopped |
| 10      | Urad Houqi Yifengxi Chemistry Co., Ltd             | Huhewenduer Town   | Inorganic acid manufacturing   |                    |
| 11      | Urad Houqi Oubulage Copper Mineral Co., Ltd        | Huogeqisumu        | Copper mining                  | Production stopped |
| 12      | Bayan Nur West Copper Co., Ltd                     | Huogeqisumu        | Copper mining                  |                    |
| 13      | Urad Houqi Xinxing Mining Co., Ltd                 | Huogeqisumu        | Copper mining                  | Production stopped |
| 14      | Urad Houqi Ebutu Nickel Mineral Co., Ltd           | Chaogewenduer Town | Nickel and cobalt mining       |                    |
